# Supplementary material for: Sugarcane calcineurin B-like (CBL) genes play important but versatile roles in regulation of responses to biotic and abiotic stresses
Source: PubMed Central journal article supplement (PMC6957512; doi:10.1038/s41598-019-57058-7), 2020-01-13
Supplement: 41598_2019_57058_MOESM1_ESM.pdf [file 41598_2019_57058_MOESM1_ESM.pdf]

# **Sugarcane calcineurin B-like (*CBL*) genes play important but versatile roles in regulation of responses to biotic and abiotic stresses**

Su Wei-hua <sup>1</sup>, Huang Long <sup>1</sup>, Ling Hui <sup>1</sup>, Mao Hua-ying <sup>1</sup>, Huang Ning <sup>1</sup>, Su Ya-chun <sup>1</sup>, Ren Yong-juan <sup>1</sup>, Wang Dong-jiao <sup>1</sup>, Xu Li-ping <sup>1</sup>, Khushi Muhammad <sup>2</sup> & Que You-xiong <sup>1,3,\*</sup>

<sup>1</sup> Key Laboratory of Sugarcane Biology and Genetic Breeding, Ministry of Agriculture, Fujian Agriculture and Forestry University, Fuzhou 350002, China

<sup>2</sup> Department of Genetics, Hazara University, Mansehra, Pakistan

<sup>3</sup> Guangxi Collaborative Innovation Center of Sugarcane Industry, Guangxi University, Nanning 530005, China

\*Corresponding author. E-mail: [queyouxiong@126.com](mailto:queyouxiong@126.com)

## Supplementary tables

**Table S1** Primers used in this study

| Primer                | Forward primer (5'-3')                                         | Reverse primer (5'-3')                                        | Strategy                                                 |
|-----------------------|----------------------------------------------------------------|---------------------------------------------------------------|----------------------------------------------------------|
| <i>ScCBL2-1</i>       | ATGTTGCAGTGCCTGGATG                                            | GGTATCATCGACCTGAGAAT                                          | Gene cloning                                             |
| <i>ScCBL3-1</i>       | GCCTGCCCAACTCGATTCT                                            | ACTCGAATCCAGCATGCAAC                                          | Gene cloning                                             |
| <i>ScCBL4</i>         | GTGCTTGCTTTGGTCGCTT                                            | GTTGCATCCTTCAGTGCGTT                                          | Gene cloning                                             |
| <i>qScCBL2-1</i>      | TGAGGAGGCAGACACAAG                                             | CGACCTGAGAATGGAAGACA                                          | qRT-PCR analysis                                         |
| <i>qScCBL3-1</i>      | ATGGTTGTTGCGACACTTGC                                           | AGCAAGGATGGATGCCGAAT                                          | qRT-PCR analysis                                         |
| <i>qScCBL4</i>        | GCAAGCAGACATGAACGACG                                           | GTGTTCCCTTCCCTCCAGCA                                          | qRT-PCR analysis                                         |
| <i>CAC</i>            | ACAACGTCAGGCAAAGCAAA                                           | AGATCAACTCCACCTCTGCG-3                                        | qRT-PCR analysis                                         |
| <i>CUL</i>            | TGCTGAATGTGTTGAGCAGC                                           | TTGTGCGCGCTCCAAGTAGTC                                         | qRT-PCR analysis                                         |
| <i>gScCBL2-1</i>      | <u>GGGGACAAGTTTGTACAAAAAAGCAGGCTTC</u><br>ATGTTGCAGTGCCTGGATGG | <u>GGGGACCACTTTGTACAAGAAAGCTGGGTCG</u><br>GTATCATCGACCTGAGAAT | Gateway entry vector construction and<br>RT-PCR analysis |
| <i>gScCBL3-1</i>      | <u>GGGGACAAGTTTGTACAAAAAAGCAGGCTTC</u><br>ATGGTGCAGTGCCTGGACGG | <u>GGGGACCACTTTGTACAAGAAAGCTGGGTCG</u><br>TTATCATCGACTTGAGAGT | Gateway entry vector construction and<br>RT-PCR analysis |
| <i>gScCBL4</i>        | <u>GGGGACAAGTTTGTACAAAAAAGCAGGCTTC</u><br>ATGGGGTGTGTCTCCTCCAA | <u>GGGGACCACTTTGTACAAGAAAGCTGGGTCG</u><br>AACTCTTCATCACTAGCTC | Gateway entry vector construction and<br>RT-PCR analysis |
| <i>NtHSR201</i>       | CAGCAGTCCTTTGGCGTTGTC                                          | GCTCAGTTTAGCCGCAGTTGTG                                        | qRT-PCR analysis                                         |
| <i>NtHSR203</i>       | TGGCTCAACGATTACGCA                                             | GCACGAAACCTGGATGG                                             | qRT-PCR analysis                                         |
| <i>NtHSR515</i>       | TTGGGCAGAATAGATGGGTA                                           | TTTGGTGAAAGTCTTGCGTC                                          | qRT-PCR analysis                                         |
| <i>NtPR-1a/c</i>      | AACCTTTGACCTGGGACGAC                                           | GCACATCCAACACGAACCGA                                          | qRT-PCR analysis                                         |
| <i>NtPR2</i>          | TGATGCCCTTTTGGATTCTATG                                         | AGTTCCTGCCCCGCTTT                                             | qRT-PCR analysis                                         |
| <i>NtPR3</i>          | CAGGAGGGTATTGCTTTGTTAGG                                        | CGTGGGAAGATGGCTTGTTGTC                                        | qRT-PCR analysis                                         |
| <i>NtEFE26</i>        | CGGACGCTGGTGGCATAAT                                            | CAACAAGAGCTGGTGGCTGGATA                                       | qRT-PCR analysis                                         |
| <i>NtAccdeaminase</i> | TCTGAGGTTACTGATTTGGATTGG                                       | TGGACATGGTGGATAGTTGCT                                         | qRT-PCR analysis                                         |
| <i>NtEF1-α</i>        | TGCTGCTGTAACAAGATGGATGC                                        | GAGATGGGGACAAAGGGGATT                                         | qRT-PCR analysis                                         |

Note: attB1 and attB2 adapters were underlined in the primer *gScCBLs*.

**Table S2** The amplification reaction procedures for cloning of sugarcane *ScCBLs*

| <b>Gene name</b> | <b>Pre-denaturation</b> | <b>Denaturation</b> | <b>Annealing</b> | <b>Extension</b> | <b>Cycles</b> | <b>Extension</b> |
|------------------|-------------------------|---------------------|------------------|------------------|---------------|------------------|
| <i>ScCBL2-1</i>  | 94 °C 4 min             | 94 °C 1 min         | 55 °C 30 s       | 72 °C 80 s       | 35            | 72 °C 10 min     |
| <i>ScCBL3-1</i>  | 94 °C 4 min             | 94 °C 30 s          | 55 °C 30 s       | 72 °C 2 min      | 35            | 72 °C 10 min     |
| <i>ScCBL4</i>    | 94 °C 4 min             | 94 °C 30 s          | 55 °C 30 s       | 72 °C 2 min      | 35            | 72 °C 10 min     |

**Table S3** GenBank Accession Numbers used in this study

| Species name                | Gene name                        | GenBank<br>Accession Numbers | Species name           | Gene name  | GenBank<br>Accession Numbers    |        |          |
|-----------------------------|----------------------------------|------------------------------|------------------------|------------|---------------------------------|--------|----------|
| <i>Arabidopsis thaliana</i> | AtCBL1                           | AAC26008                     | <i>Oryza sativa</i>    | OsCBL1     | DQ201195                        |        |          |
|                             | AtCBL2                           | AAC26009                     |                        | OsCBL2     | DQ201196                        |        |          |
|                             | AtCBL3                           | AAC26010                     |                        | OsCBL3     | DQ201197                        |        |          |
|                             | AtCBL4                           | AAC26110                     |                        | OsCBL4     | DQ201198                        |        |          |
|                             | AtCBL5                           | CAB80951                     |                        | OsCBL5     | DQ201199                        |        |          |
|                             | AtCBL6                           | AAG28400                     |                        | OsCBL6     | DQ201200                        |        |          |
|                             | AtCBL7                           | AAG10059                     |                        | OsCBL6     | DQ201201                        |        |          |
|                             | AtCBL8                           | AAL10300                     |                        | OsCBL8     | DQ201202                        |        |          |
|                             | AtCBL9                           | AAL10301                     |                        | OsCBL9     | DQ201203                        |        |          |
|                             | AtCBL10                          | AAO72364                     |                        | OsCBL10    | DQ201204                        |        |          |
| <i>Zea mays</i>             | ZmCBL1                           | EU907931                     | <i>Sorghum bicolor</i> | SbCBL1     | FJ901259                        |        |          |
|                             | ZmCBL2-1                         | EU907932                     |                        | SbCBL2     | FJ901264                        |        |          |
|                             | ZmCBL2-2                         | EU907933                     |                        | SbCBL3     | FJ901265                        |        |          |
|                             | ZmCBL3                           | EU907934                     |                        | SbCBL4     | FJ901261                        |        |          |
|                             | ZmCBL5                           | EU907935                     |                        | SbCBL5     | FJ901263                        |        |          |
|                             | ZmCBL6                           | EU907936                     |                        | SbCBL6     | FJ901262                        |        |          |
|                             | ZmCBL8                           | EU907937                     |                        | SbCBL7     | FJ901260                        |        |          |
|                             | ZmCBL10                          | EU907938                     |                        | SbCBL8     | FJ901266                        |        |          |
|                             | <i>Saccharum</i> spp.<br>(ROC22) | SsCBL1                       |                        | KC800815.1 | <i>Saccharum</i> spp.<br>(GT28) | SoCBL1 | KC800815 |
|                             |                                  | ScCBL2-1                     |                        | KX013374   |                                 | SoCBL3 | KC800816 |
| ScCBL3-1                    |                                  | KX013375                     | SoCBL5                 | KC800817   |                                 |        |          |
| ScCBL4                      |                                  | KX013376                     | SoCBL6                 | KC800818   |                                 |        |          |
| SsCBL6                      |                                  | KC800818.1                   | SoCBL9                 | KC800819   |                                 |        |          |

## Supplementary figures

|           |                                                                                     |     |
|-----------|-------------------------------------------------------------------------------------|-----|
| AtCBL2    | .....MSQCVDGKHLCTSVLGCDFDLDYK.QSGGLGDPPELLARDTVFS.VSEIEALYELFK                      | 55  |
| AtCBL3    | .....MSQCIDGFKHVCSSFFRCFDIDYK.QSGGLGDPPELLARETVFS.VSEIEALYELFK                      | 55  |
| ScCBL2-1  | .....MLQCLDGVKHLGLVLLKCCDIDLK..QPKGLEDPVLARETVFS.VSEVEALYELFK                       | 54  |
| ScCBL3-1  | .....MVQCLDGVQRLLAVLLKCCDVELK..QPRGLEDPQVLARETVFS.VSEVEALYELFK                      | 54  |
| AtCBL1    | .....MG.CFHSKAAK...EFRGHEDPVKLASETAFS.VSEVEALFELFK                                  | 40  |
| AtCBL9    | .....MG.CFHSTAAR...EFPDHENPVKLASETAFS.VSEVEALYELFK                                  | 40  |
| AtCBL10   | MEQVSSRSSSLTVGEQFCVAFIPFFFAIIDVLVSSVQCFCDCRSTSP...RTCQHADLERLARESCFS.VNEVEALYELFK   | 76  |
| AtCBL4    | .....MG.CSVSKKKKKNAMRPPGYEDPELLASVTTFE.VEEVEALYELFK                                 | 44  |
| ScCBL4    | .....MG.CVSSKGSK...RPPGYVDPNILAKETTFE.VNEVEALYELFK                                  | 40  |
| AtCBL8    | .....MLAFVK.CFSLKRAK...HPRGYEDPHVLASETTFE.VNEIEALHDLFK                              | 44  |
| AtCBL5    | .....MG.CVCSKQLE...GRRQEDISLLASQTFE.EAEVEVLHGLFI                                    | 39  |
| AtCBL6    | .....MMMQLDGLKHLALILLTCCDAD...PPKVRQNPKDVARGTVET.VNEIEALYELFK                       | 53  |
| AtCBL7    | .....MDSTRNSASSNS...TGCFTDQKKRKLALYEVEKLLSGVDCQRNEGN                                | 43  |
| Consensus | .....a f                                                                            |     |
| AtCBL2    | KISSAVIDDGLINKEEFQALAFKTNKKESLFADRVFDLFDTKHNGILGEEEFARALSVFHPNAPIDDKIHFSFQLMDDLKQ   | 135 |
| AtCBL3    | KISSAVIDDGLINKEEFQALAFKTNKKESLFADRVFDLFDTKHNGILGEEEFARALSVFHPNAPIDDKIHFSFQLMDDLKQ   | 135 |
| ScCBL2-1  | KISSAVIDDGLINKEEFQALAFKTNKKESLFADRVFDLFDTKHNGILGEEEFARALSVFHPNAPIDDKIHFSFQLMDDLKQ   | 134 |
| ScCBL3-1  | KISSAVIDDGLINKEEFQALAFKTNKKESLFADRVFDLFDTKHNGILGEEEFARALSVFHPNAPIDDKIHFSFQLMDDLKQ   | 134 |
| AtCBL1    | SISSSVDDGLINKEEFQALAFKSRKRENIIFANRIEFDLFDVKKRNGVIDEGDFVRSINVFHPNAPIDDKIHFSFQLMDDLKQ | 120 |
| AtCBL9    | SISSSVDDGLINKEEFQALAFKSRKRENIIFANRIEFDLFDVKKRNGVIDEGDFVRSINVFHPNAPIDDKIHFSFQLMDDLKQ | 120 |
| AtCBL10   | KLSCSIIDDGLIHKEELRLALFQAPYGENLFLDRVFDLFDLDEKKNVIEEETHALSVFHPNAPIDDKIHFSFQLMDDLKQ    | 156 |
| AtCBL4    | KLSSSIIDDGLIHKEEFQALAFKRNRRNRLFADRVFDLFDVKKRNGVIDEGDFVRSINVFHPNAPIDDKIHFSFQLMDDLKQ  | 124 |
| ScCBL4    | KISYSIIKDGLIHKEEFQALAFKRNRRNRLFADRVFDLFDLKRNGVIDEGDFVRSINVFHPNAPIDDKIHFSFQLMDDLKQ   | 120 |
| AtCBL8    | KLSTSIINDGLIHKEEFLALFRNGSMQNLFADRVFDFDRKRNGVIDEGDFVRSINVFHPNAPIDDKIHFSFQLMDDLKQ     | 124 |
| AtCBL5    | KLTSCLSNNDLLTKKFKQFILKNTKRRSLSAERIEFDLFDLKRNGVIDEGDFVRSINVFHPNAPIDDKIHFSFQLMDDLKQ   | 119 |
| AtCBL6    | SIS...KNGLIDKEQFQVLVLFKMNTRSLFADRVFDLFDLKRNGVIDEGDFVRSINVFHPNAPIDDKIHFSFQLMDDLKQ    | 129 |
| AtCBL7    | VVEGVTCTYYGEMNKEQFHVAIFQTDKNESLFSERIEFDLFDLKRNGVIDEGDFVRSINVFHPNAPIDDKIHFSFQLMDDLKQ | 123 |
| Consensus | .....ke r f fd g f f l fhp k f l d                                                  |     |
| AtCBL2    | QGFIERQEVKQMVVATLAESGMNLDKTVIEDIIDKTFEEADTKHDGKIDKEEWRSLVLRHPSLLKNMTLQYLKDIITTTFF   | 215 |
| AtCBL3    | QGFIERQEVKQMVVATLAESGMNLDKTVIEDIIDKTFEEADTKHDGKIDKEEWRSLVLRHPSLLKNMTLQYLKDIITTTFF   | 215 |
| ScCBL2-1  | QGFIERQEVKQMVVATLAESGMNLDKTVIEDIIDKTFEEADTKHDGKIDKEEWRSLVLRHPSLLKNMTLQYLKDIITTTFF   | 214 |
| ScCBL3-1  | QGFIERQEVKQMVVATLAESGMNLDKTVIEDIIDKTFEEADTKHDGKIDKEEWRSLVLRHPSLLKNMTLQYLKDIITTTFF   | 214 |
| AtCBL1    | TGFIERQEVKQMLIALCESEMKLADDEIIEIIDKTFEADTVNQDGKIDKLEWSDVFNKNPSLLKIMTLPYLRDITTTFF     | 200 |
| AtCBL9    | TGFIERQEVKQMLIALCESEMKLADDEIIEIIDKTFEADTVNQDGKIDKLEWSDVFNKNPSLLKIMTLPYLRDITTTFF     | 173 |
| AtCBL10   | TGFIEREVQQMVSAIILLESMDMLSDLELTMIDKVVSS.....SLSVSRKKTVL.....                         | 194 |
| AtCBL4    | TGFIEREELKEMVVALHESELVLSDEMTIEVMVDKAFVQADRNDGKIDIDEWKDFVSLNPSLTKNMTLPYLKDIRNTRFF    | 204 |
| ScCBL4    | TGFIEREELKEMVVALHESELVLSDEMTIEVMVDKAFVQADRNDGKIDIDEWKDFVSLNPSLTKNMTLPYLKDIRNTRFF    | 200 |
| AtCBL8    | TGFIERPEHLKVMGALLGHTDLELSEESIIEAVEQTMLEVDITNKDGKIDEEWKELVAKNPSLTKNMTLPYLKDIRNTRFF   | 204 |
| AtCBL5    | TGFIERPEEVKEMIIDVLEESLMLSESIIDSIIVSKTFEEADTKHDGKIDIDEWKELVAKNPSLTKNMTLPYLKDIRNTRFF  | 199 |
| AtCBL6    | QGFIERQEVKQMVVATLAESGMNLDKTVIEDIIDKTFEEADTKHDGKIDKEEWRSLVLRHPSLLKNMTLQYLKDIITTTFF   | 209 |
| AtCBL7    | QGFIERQGVKQLVVATLAESGMSQSDIEIIESIIDKTFVQADTKHEGMIDIEEWMDLVFRHPLLLKNMTLQYLKDIITTTFF  | 203 |
| Consensus | .....g i 1                                                                          |     |
| AtCBL2    | SFVFHQSQVEDT.....                                                                   | 226 |
| AtCBL3    | SFVFHQSQVEDT.....                                                                   | 226 |
| ScCBL2-1  | SFVFHQSQVDDT.....                                                                   | 225 |
| ScCBL3-1  | SFVFHQSQVDDN.....                                                                   | 225 |
| AtCBL1    | SFVFHSEVDEIAT.....                                                                  | 213 |
| AtCBL9    | .....                                                                               | 173 |
| AtCBL10   | .....                                                                               | 194 |
| AtCBL4    | SFVSSCEEEEMELQNVS                                                                   | 221 |
| ScCBL4    | SFVLNSGASDEEL....                                                                   | 213 |
| AtCBL8    | SFVLDSEVED.....                                                                     | 214 |
| AtCBL5    | TFLR.....                                                                           | 203 |
| AtCBL6    | NVVFHTIVTDTPSELDG                                                                   | 226 |
| AtCBL7    | SFVLHSQVEDT.....                                                                    | 214 |
| Consensus | .....                                                                               |     |

Figure S1 Sequence homology analysis of sugarcane and *A. thaliana* CBLs. Sequences highlighted in dark blue, red, and light blue indicate homology 100%,  $\geq 75\%$ , and  $\geq 50\%$  homology, respectively. GenBank accession numbers were as follows: AtCBL1 (AAC26008); AtCBL2 (AAC26009); AtCBL3 (AAC26010); AtCBL4 (AAC26110); AtCBL5 (CAB80951); AtCBL6 (AAG28400); AtCBL7 (AAG10059); AtCBL8 (AAL10300); AtCBL9 (AAL10301); AtCBL10 (AAO72364); ScCBL2-1 (KX013374); ScCBL3-1 (KX013375); ScCBL4 (KX013376).

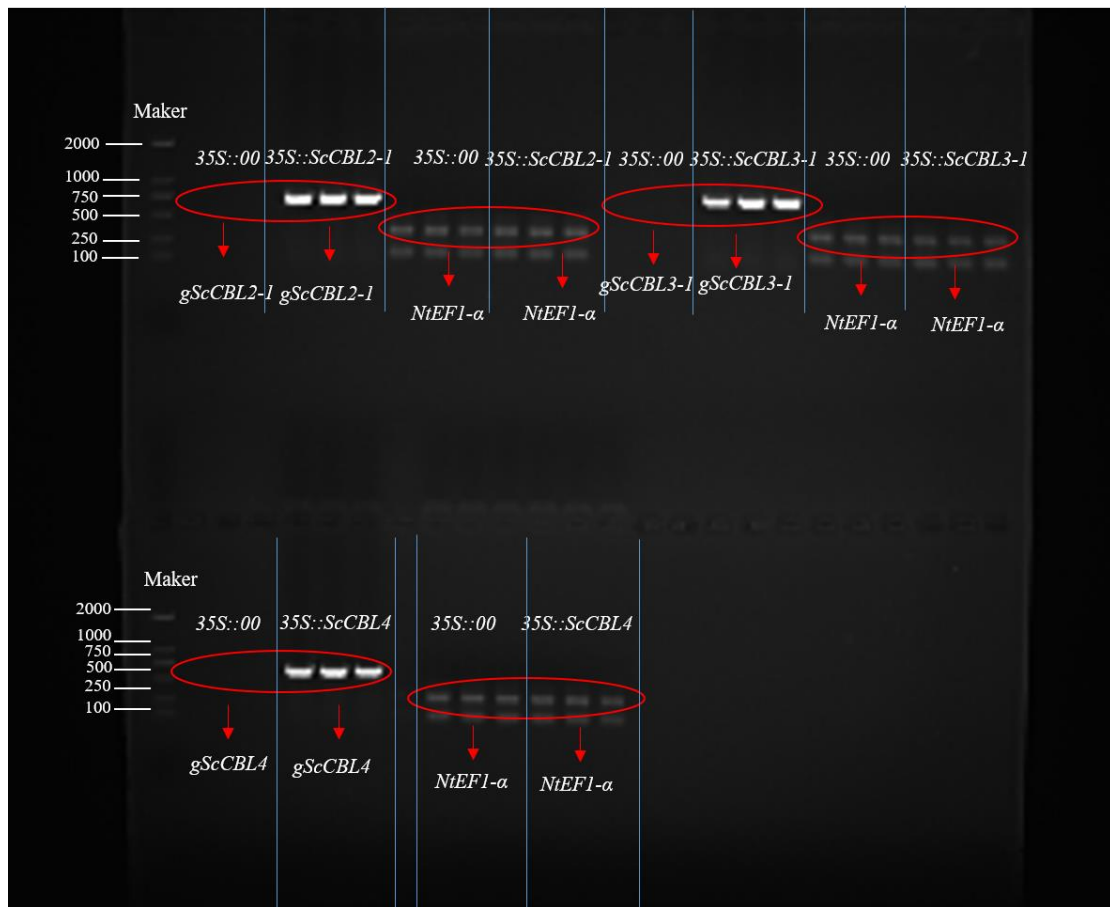

Figure S2 RT-PCR analysis of *ScCBLs* in the *N. benthamiana* leaves at 24 h post-infiltration. Note: 35S::00 stands for the control templet, 35S::ScCBL2-1, 35S::ScCBL3-1, and 35S::ScCBL4 stand for the templet of instantaneous expression *ScCBL2-1*, *ScCBL3-1*, and *ScCBL4*, respectively. *gScCBL2-1*, *gScCBL3-1*, *gScCBL4* and *NtEF1-α* represented the primer used in the RT-PCR.
